# Supplementary material
Source: Springer Nature journal article supplement (https://www.springermedizin.de/resource/supplementary/12865_2008_228_MOESM2_ESM.pdf/9427680)

**A:**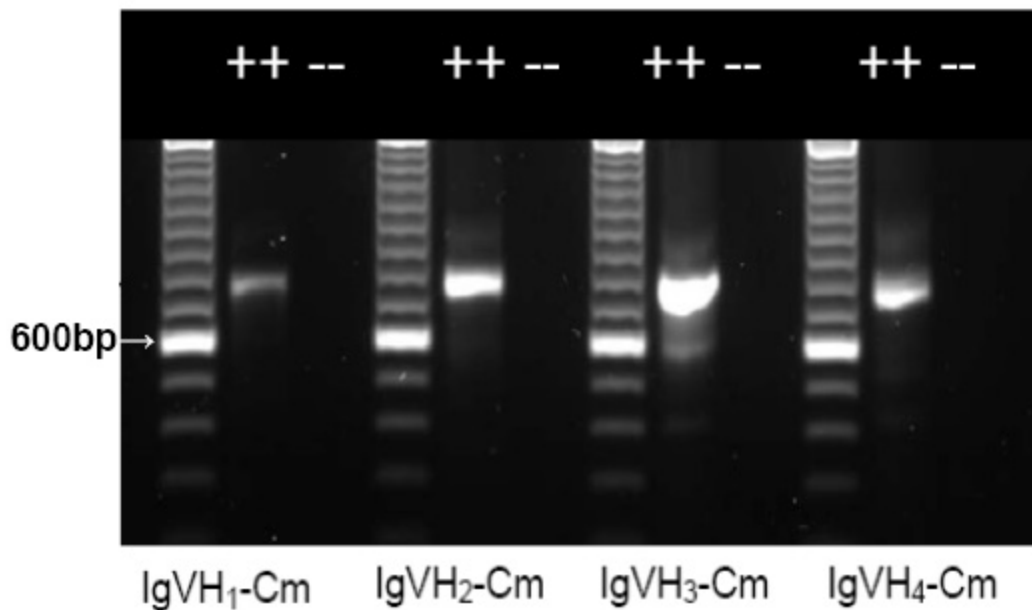**B:**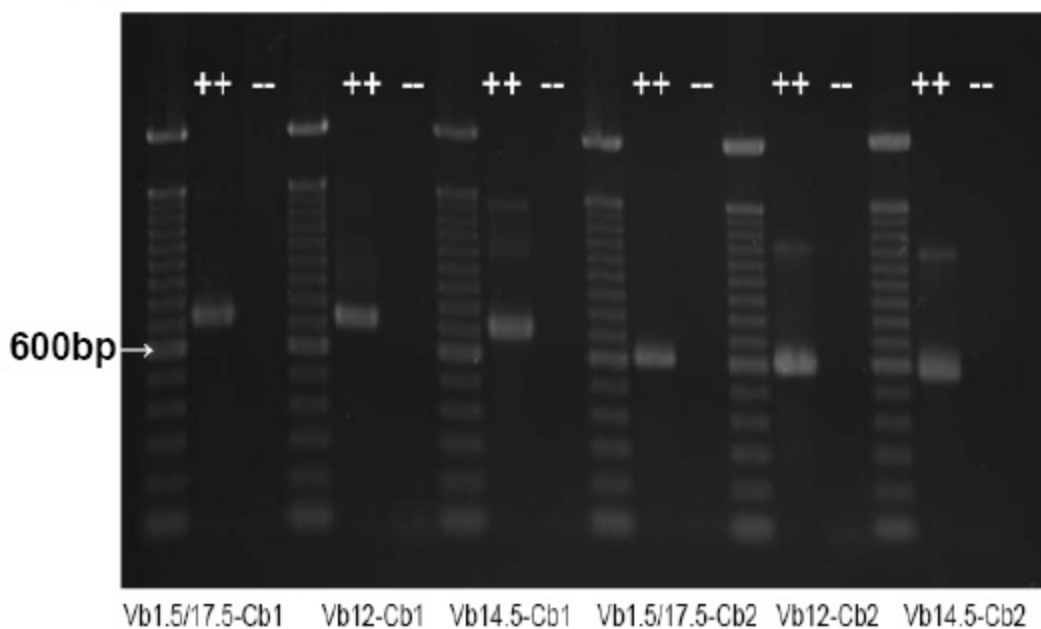**C:**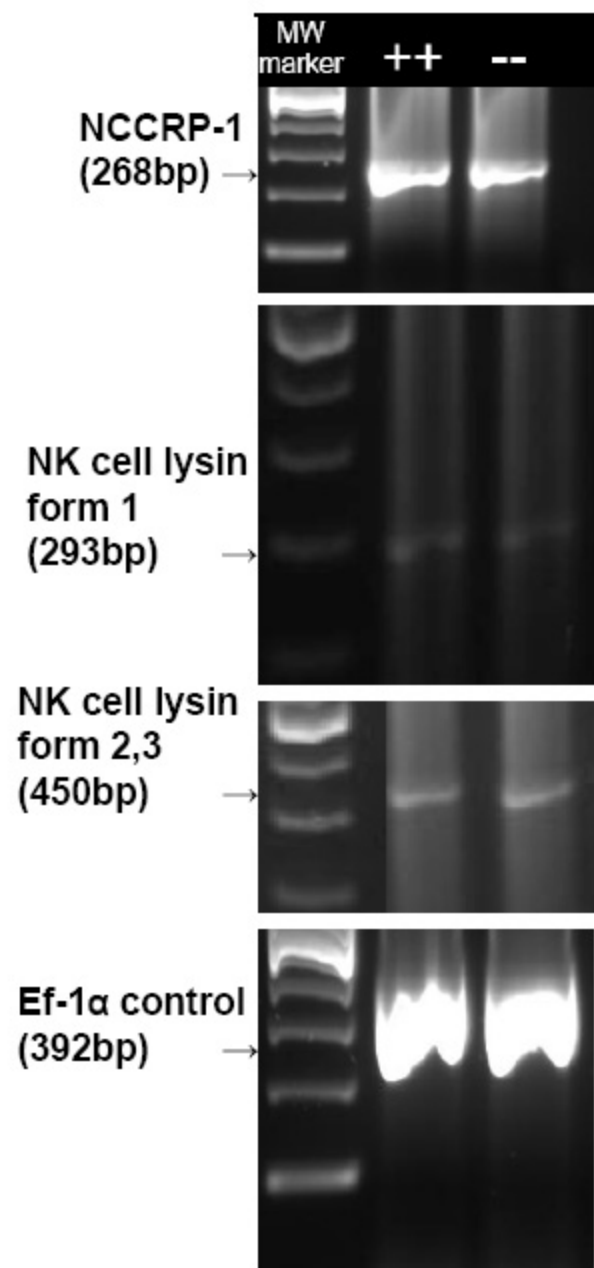

Supplement: MOESM2 [file 9427680]
